# Supplementary material for: HIV-1 Nef sequesters MHC-I intracellularly by targeting early stages of endocytosis and recycling
Source: PubMed Central journal article supplement (PMC5107982; doi:10.1038/srep37021), 2016-11-14
Supplement: srep37021-s1.pdf [file srep37021-s1.pdf]

**HIV-1 Nef sequesters MHC-I intracellularly by targeting early stages of  
endocytosis and recycling**

Brennan S. Dirk<sup>1</sup>, Emily N. Pawlak<sup>1</sup>, Aaron L. Johnson<sup>1</sup>, Logan R. Van Nynatten<sup>1</sup>, Rajesh  
A. Jacob<sup>1</sup>, Bryan Heit<sup>1</sup> and Jimmy D. Dikeakos<sup>1</sup>

<sup>1</sup>Department of Microbiology and Immunology, The University of Western Ontario,  
Schulich School of Medicine and Dentistry. London, Ontario, Canada.

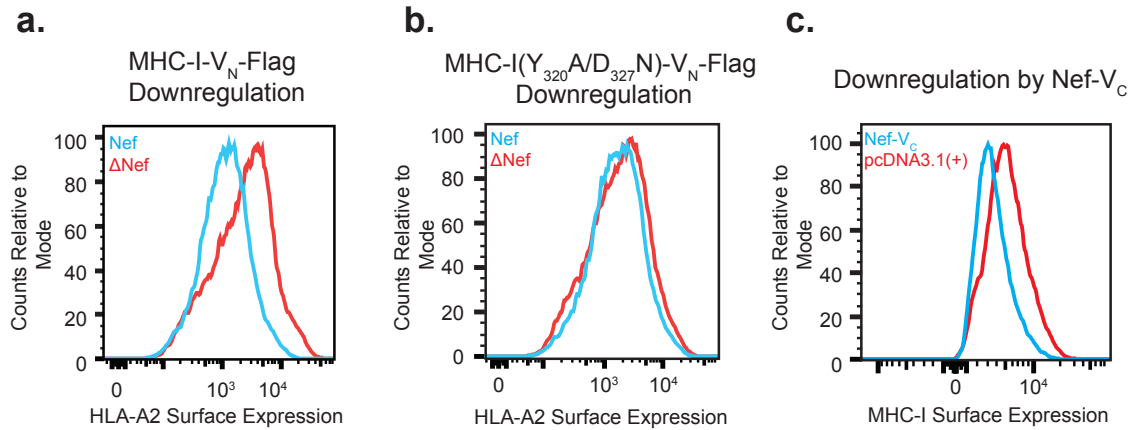

**Supplemental Figure S1: Functionality of MHC-I and Nef fusion proteins.**

(A and B) MHC-I- $V_N$ -Flag or MHC-I- $Y_{320}A/D_{327}N$ - $V_N$ -Flag and Nef-eGFP (blue line) or eGFP (red line) were co-transfected in HeLa cells and surface stained with BB7.2 (HLA-A2 specific antibody) and surface levels of MHC-I were quantified by flow cytometry upon gating on eGFP positive cells. (C) Nef- $V_C$  or empty backbone (pcDNA3.1) and eGFP were co-transfected and surface stained with W6/32 MHC-I antibody and surface levels of MHC-I were quantified by flow cytometry after upon on GFP positive cells. Histograms are representative of 3 independent experiments.

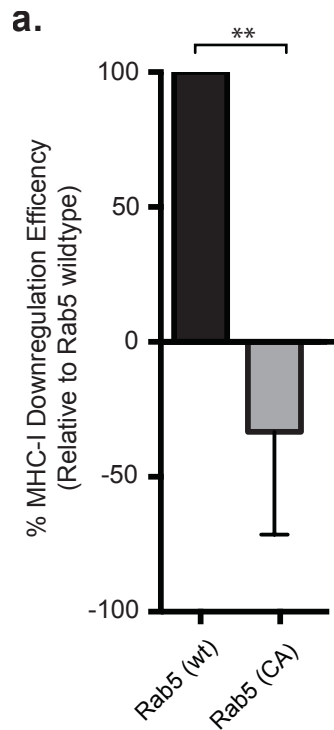

**Supplemental Figure S2: Disruption of early endosomal regulation interferes with Nef-mediated MHC-I downregulation.**

(A) HeLa cells were co-transfected with mCherry-tagged Rab5-constitutively active (CA) or Rab5 and Nef-eGFP or empty eGFP encoding backbone. Twenty-four hours post transfection, cell surface levels of MHC-I were measured by flow cytometry by gating on GFP and mCherry positive cells. Downregulation efficiency was calculated relative to Rab5 (wt) using the following formula:  $\text{Relative MFI} = \{ [1 - \text{Rab5}_{\text{mut}}\text{Nef} / \text{Rab5}_{\text{mut}}\Delta\text{Nef}] / [1 - (\text{Rab5}_{\text{wt}}\text{Nef} / \text{Rab5}_{\text{wt}}\Delta\text{Nef})] \} \times 100$ . (B) A representative histogram of MHC-I surface levels from 3 independent experiments is shown. Error bars were calculated from 3 independent experiments (\*\* indicates p-value < 0.01).

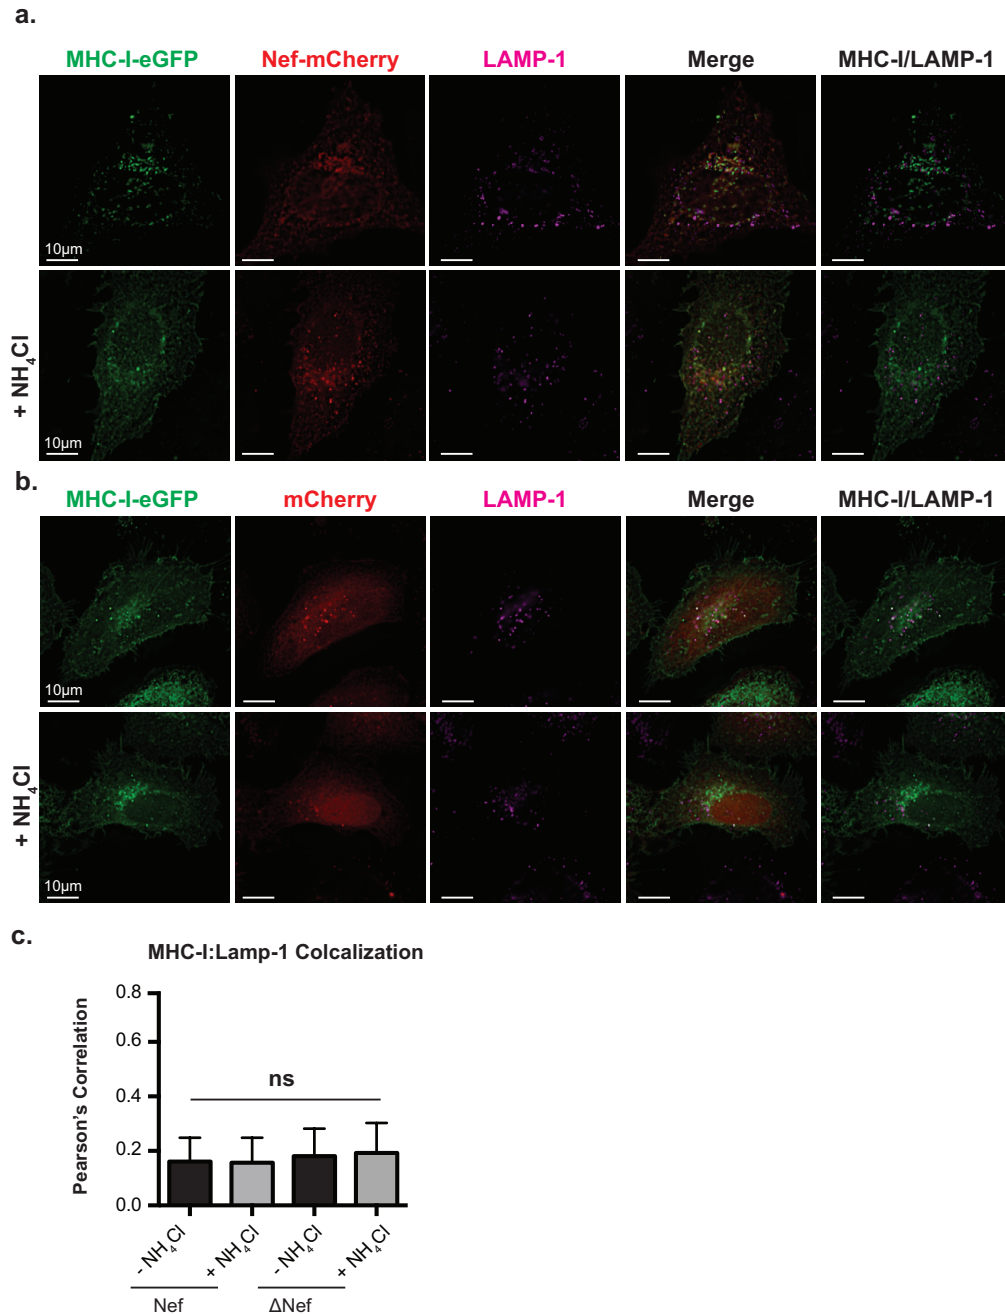

**Supplemental Figure S3: Lysosomal localization of MHC-I-eGFP**

(A) HeLa cells were transfected with MHC-I-eGFP (green) and Nef-mCherry (red). Twenty hours post transfection cells were treated with 100mM ammonium chloride for 4 hours. Following treatment, cells were fixed and immunostained for LAMP-1 (magenta).

(B) HeLa cells were transfected with MHC-I-eGFP (green) and mCherry backbone (red). 20 hours post transfection, cells were treated with 100mM Ammonium chloride for 4 hours. Following treatment, cells were fixed and immunostained for LAMP-1 (magenta).

(C) Co-localization of MHC-I and LAMP-1 were quantified by the Pearson's correlation through the JaCoP Plug-in on ImageJ. Error bars were calculated by quantification of at least 30 cells between 3 independent experiments, (ns: not significant).
